# Supplementary material for: Cationic and dicationic zirconocene compounds as initiators of carbocationic isobutene polymerisation
Source: Royal Society of Chemistry journal article supplement (doi:10.1039/b908611k), 2009-01-01
Supplement: b908611k.pdf [file b908611k.pdf]

Electronic Supplementary Information  
 Cartesian Coordinates for Isobutene

| Center Number | Atomic Number | Atomic Type | Coordinates (Angstroms) |           |           |
|---------------|---------------|-------------|-------------------------|-----------|-----------|
|               |               |             | X                       | Y         | Z         |
| 1             | 6             | 0           | 0.000356                | 1.459496  | -0.000007 |
| 2             | 1             | 0           | 0.925154                | 2.031392  | -0.000081 |
| 3             | 1             | 0           | -0.924161               | 2.031886  | 0.000211  |
| 4             | 6             | 0           | -0.000006               | 0.122891  | -0.000056 |
| 5             | 6             | 0           | -1.278289               | -0.678646 | 0.000011  |
| 6             | 1             | 0           | -2.163247               | -0.034946 | 0.000848  |
| 7             | 1             | 0           | -1.333099               | -1.334027 | -0.880450 |
| 8             | 1             | 0           | -1.332334               | -1.335340 | 0.879528  |
| 9             | 6             | 0           | 1.277980                | -0.679200 | 0.000011  |
| 10            | 1             | 0           | 1.332496                | -1.334512 | 0.880531  |
| 11            | 1             | 0           | 1.331778                | -1.335899 | -0.879507 |
| 12            | 1             | 0           | 2.163172                | -0.035801 | -0.000832 |

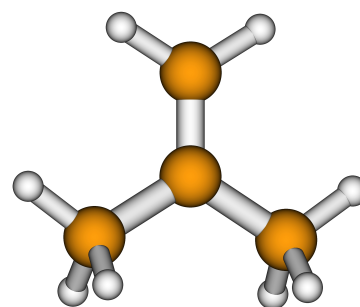

Bader Analysis of Isobutene

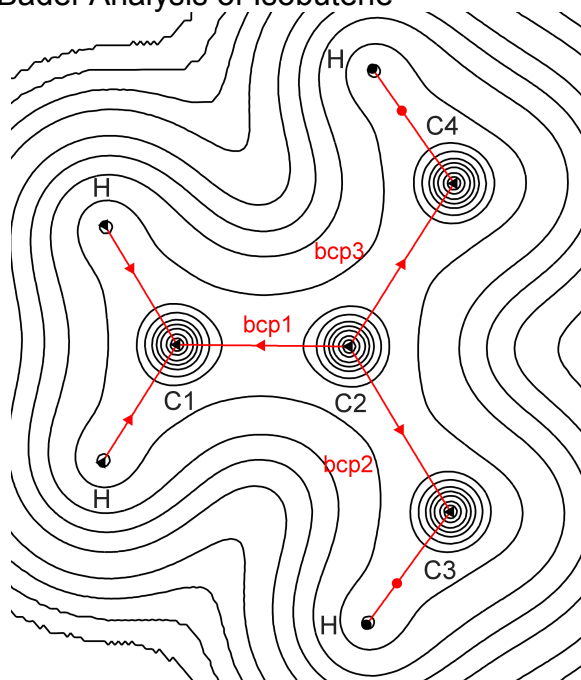

|      | $\rho(r)$ | $\nabla^2\rho(r)$ |
|------|-----------|-------------------|
| bcp1 | 0.3438    | 0.24695           |
| bcp2 | 0.2547    | 0.15073           |
| bcp3 | 0.2547    | 0.15071           |

Figure S1: Electron Density Plot of isobutene

## Cartesian Coordinates for **6**

| Center Number | Atomic Number | Atomic Type | Coordinates (Angstroms) |           |           |
|---------------|---------------|-------------|-------------------------|-----------|-----------|
|               |               |             | X                       | Y         | Z         |
| 1             | 6             | 0           | -6.286634               | -0.050130 | -0.260231 |
| 2             | 6             | 0           | -5.657282               | 0.790965  | 0.661486  |
| 3             | 6             | 0           | -4.299028               | 1.079056  | 0.532578  |
| 4             | 6             | 0           | -3.552438               | 0.530470  | -0.519036 |
| 5             | 6             | 0           | -4.190990               | -0.308219 | -1.439330 |
| 6             | 6             | 0           | -5.551559               | -0.597977 | -1.311819 |
| 7             | 6             | 0           | -2.065654               | 0.836268  | -0.653288 |
| 8             | 6             | 0           | -1.247174               | 0.170604  | 0.435501  |
| 9             | 6             | 0           | -0.592017               | 0.816726  | 1.529575  |
| 10            | 6             | 0           | -0.075469               | -0.172089 | 2.406001  |
| 11            | 6             | 0           | -0.360261               | -1.440375 | 1.837071  |
| 12            | 6             | 0           | -1.083235               | -1.225550 | 0.625314  |
| 13            | 40            | 0           | 1.283529                | -0.398754 | 0.276377  |
| 14            | 6             | 0           | 2.811272                | 0.218400  | 1.845927  |
| 15            | 6             | 0           | 3.351797                | -1.361013 | -0.938131 |
| 16            | 6             | 0           | 2.292555                | -1.378246 | -1.883976 |
| 17            | 6             | 0           | 1.296959                | -2.274959 | -1.417997 |
| 18            | 6             | 0           | 1.753881                | -2.827183 | -0.185253 |
| 19            | 6             | 0           | 3.024867                | -2.264695 | 0.104622  |
| 20            | 1             | 0           | -0.549823               | 1.887666  | 1.692945  |
| 21            | 1             | 0           | 4.263335                | -0.782353 | -1.009473 |
| 22            | 1             | 0           | -0.129787               | -2.401449 | 2.279325  |
| 23            | 1             | 0           | 0.381402                | -2.536565 | -1.932974 |
| 24            | 1             | 0           | -1.492380               | -1.998098 | -0.013633 |
| 25            | 1             | 0           | 1.245003                | -3.584043 | 0.397067  |
| 26            | 1             | 0           | 0.438596                | 0.007542  | 3.339917  |
| 27            | 1             | 0           | 2.260304                | -0.827861 | -2.816609 |
| 28            | 1             | 0           | -1.728794               | 0.509984  | -1.645763 |
| 29            | 1             | 0           | -1.905685               | 1.921001  | -0.607669 |
| 30            | 1             | 0           | -3.818870               | 1.739634  | 1.251496  |
| 31            | 1             | 0           | -3.627624               | -0.727536 | -2.270778 |
| 32            | 1             | 0           | -6.225902               | 1.226749  | 1.477982  |
| 33            | 1             | 0           | -6.035588               | -1.245329 | -2.037491 |
| 34            | 1             | 0           | -7.345200               | -0.271601 | -0.161200 |
| 35            | 1             | 0           | 3.639904                | -2.488406 | 0.966191  |
| 36            | 1             | 0           | 2.503751                | 1.142647  | 2.353055  |
| 37            | 1             | 0           | 2.955392                | -0.538702 | 2.628613  |
| 38            | 1             | 0           | 3.794477                | 0.382156  | 1.383706  |
| 39            | 6             | 0           | 1.333943                | 1.852433  | -1.169826 |
| 40            | 1             | 0           | 1.304357                | 1.288211  | -2.101897 |
| 41            | 1             | 0           | 0.384609                | 2.216281  | -0.787194 |
| 42            | 6             | 0           | 2.493278                | 2.456792  | -0.775975 |
| 43            | 6             | 0           | 3.801333                | 2.217142  | -1.473502 |
| 44            | 1             | 0           | 4.139791                | 3.159209  | -1.925057 |
| 45            | 1             | 0           | 4.581064                | 1.924143  | -0.760040 |
| 46            | 1             | 0           | 3.730731                | 1.467875  | -2.265300 |

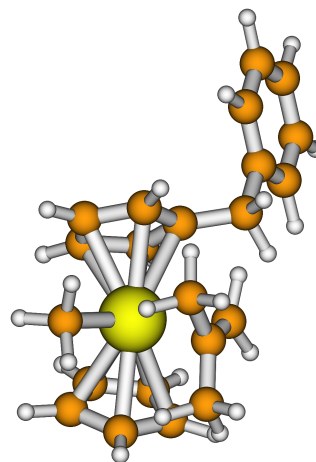

|    |   |   |          |          |           |
|----|---|---|----------|----------|-----------|
| 47 | 6 | 0 | 2.515004 | 3.470378 | 0.331903  |
| 48 | 1 | 0 | 3.286036 | 3.230084 | 1.072509  |
| 49 | 1 | 0 | 2.780940 | 4.449853 | -0.087849 |
| 50 | 1 | 0 | 1.549909 | 3.566301 | 0.835338  |

---

### Bader Analysis of **6**

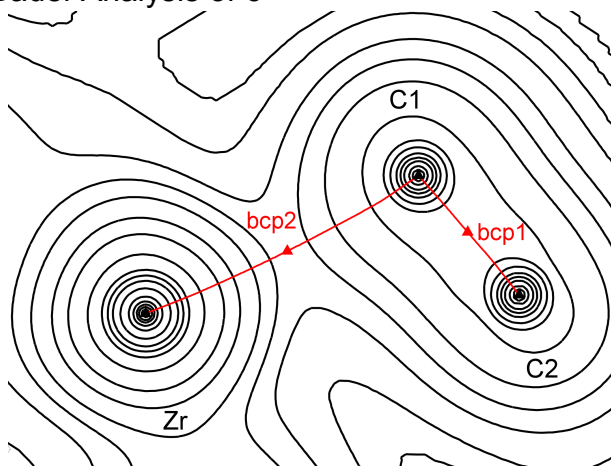

|      | $\rho(r)$ | $\nabla^2\rho(r)$ |
|------|-----------|-------------------|
| bcp1 | 0.3291    | 0.23457           |
| bcp2 | 0.0315    | -0.01862          |

Figure S2: Electron Density Plot of **6**, view along the Zr-C1-C2 plane

### NBO Analysis of **6**

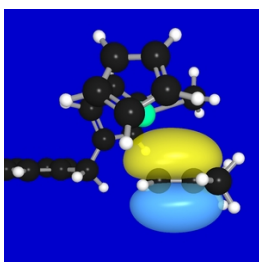

Figure S3:  
C1( $sp^{62.51}$ )-C2( $sp^{99.99}$ )  
orbital

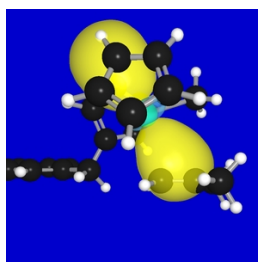

Figure S4: empty  
Zr( $sd^{20.37}$ ) orbital

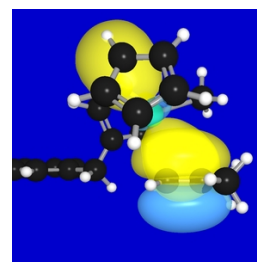

Figure S5: C1-C2  $\rightarrow$   
Zr

### Cartesian Coordinates for 7

| Center Number | Atomic Number | Atomic Type | Coordinates (Angstroms) |           |           |
|---------------|---------------|-------------|-------------------------|-----------|-----------|
|               |               |             | X                       | Y         | Z         |
| 1             | 6             | 0           | 6.339403                | 0.140456  | 0.317484  |
| 2             | 6             | 0           | 5.712343                | 0.260537  | -0.925451 |
| 3             | 6             | 0           | 4.348194                | 0.541020  | -0.997012 |
| 4             | 6             | 0           | 3.593299                | 0.705027  | 0.172246  |
| 5             | 6             | 0           | 4.229578                | 0.585382  | 1.412791  |
| 6             | 6             | 0           | 5.595856                | 0.304861  | 1.486570  |
| 7             | 6             | 0           | 2.100552                | 1.006279  | 0.094990  |
| 8             | 6             | 0           | 1.304592                | -0.197055 | -0.365575 |
| 9             | 6             | 0           | 0.819762                | -0.444062 | -1.684430 |
| 10            | 6             | 0           | 0.301440                | -1.764224 | -1.744868 |
| 11            | 6             | 0           | 0.415831                | -2.330635 | -0.449341 |
| 12            | 6             | 0           | 1.023519                | -1.359605 | 0.402011  |
| 13            | 40            | 0           | -1.286257               | -0.524978 | -0.204521 |
| 14            | 6             | 0           | -2.482801               | -0.764368 | -2.126460 |
| 15            | 6             | 0           | -3.477178               | -0.296614 | 1.110890  |
| 16            | 6             | 0           | -2.427998               | -0.226570 | 2.074385  |
| 17            | 6             | 0           | -1.774397               | -1.479762 | 2.101983  |
| 18            | 6             | 0           | -2.413082               | -2.327656 | 1.148840  |
| 19            | 6             | 0           | -3.478539               | -1.598951 | 0.555644  |
| 20            | 1             | 0           | 0.885842                | 0.245906  | -2.518046 |
| 21            | 1             | 0           | -4.180785               | 0.489825  | 0.872193  |
| 22            | 1             | 0           | 0.147926                | -3.341128 | -0.169289 |
| 23            | 1             | 0           | -0.951603               | -1.755552 | 2.748424  |
| 24            | 1             | 0           | 1.305095                | -1.511070 | 1.436640  |
| 25            | 1             | 0           | -2.175302               | -3.367070 | 0.963003  |
| 26            | 1             | 0           | -0.103727               | -2.249824 | -2.622035 |
| 27            | 1             | 0           | -2.184234               | 0.628014  | 2.693868  |
| 28            | 1             | 0           | 1.759067                | 1.332479  | 1.085720  |
| 29            | 1             | 0           | 1.928203                | 1.841024  | -0.595929 |
| 30            | 1             | 0           | 3.870854                | 0.640330  | -1.969626 |
| 31            | 1             | 0           | 3.659244                | 0.724471  | 2.329134  |
| 32            | 1             | 0           | 6.286973                | 0.141347  | -1.839507 |
| 33            | 1             | 0           | 6.077676                | 0.221256  | 2.456517  |
| 34            | 1             | 0           | 7.402476                | -0.074565 | 0.372785  |
| 35            | 1             | 0           | -4.168531               | -1.974434 | -0.187267 |
| 36            | 1             | 0           | -1.942782               | -0.320263 | -2.974214 |
| 37            | 1             | 0           | -2.695673               | -1.806684 | -2.398427 |
| 38            | 1             | 0           | -3.453023               | -0.257551 | -2.030141 |
| 39            | 6             | 0           | -1.169412               | 2.071815  | -0.515223 |
| 40            | 1             | 0           | -0.317868               | 2.172964  | 0.158327  |
| 41            | 1             | 0           | -0.945482               | 1.880694  | -1.565242 |
| 42            | 6             | 0           | -2.368240               | 2.625298  | -0.170455 |
| 43            | 6             | 0           | -2.606802               | 3.205287  | 1.194037  |
| 44            | 1             | 0           | -2.748609               | 4.290012  | 1.095669  |
| 45            | 1             | 0           | -3.530378               | 2.818559  | 1.641124  |
| 46            | 1             | 0           | -1.772090               | 3.034666  | 1.878458  |

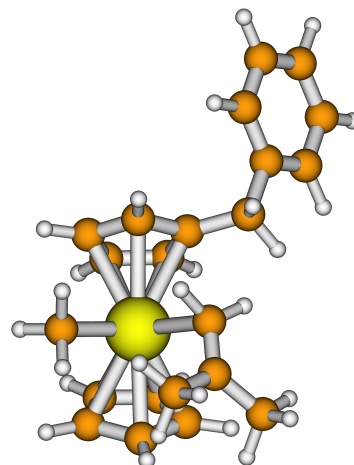

|    |   |   |           |          |           |
|----|---|---|-----------|----------|-----------|
| 47 | 6 | 0 | -3.480921 | 2.783662 | -1.165914 |
| 48 | 1 | 0 | -4.434331 | 2.421567 | -0.763007 |
| 49 | 1 | 0 | -3.623265 | 3.853993 | -1.368705 |
| 50 | 1 | 0 | -3.275416 | 2.279443 | -2.112464 |

---

### Bader Analysis of **7**

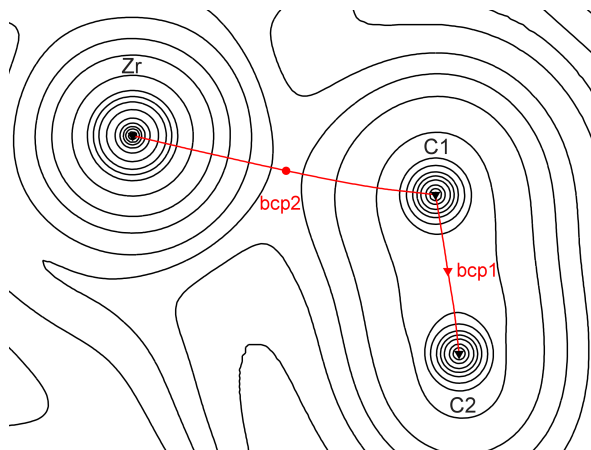

|      | $\rho(r)$ | $\nabla^2\rho(r)$ |
|------|-----------|-------------------|
| bcp1 | 0.3305    | 0.23689           |
| bcp2 | 0.0348    | -0.02124          |

Figure S6: Electron Density Plot of **7**, view along the Zr-C1-C2 plane

### Cartesian Coordinates for TS7-8

| Center Number | Atomic Number | Atomic Type | Coordinates (Angstroms) |           |           |
|---------------|---------------|-------------|-------------------------|-----------|-----------|
|               |               |             | X                       | Y         | Z         |
| 1             | 6             | 0           | 3.389954                | -1.116782 | -0.976962 |
| 2             | 6             | 0           | 2.369433                | -0.971726 | -1.953479 |
| 3             | 6             | 0           | 1.302288                | -1.836607 | -1.610775 |
| 4             | 6             | 0           | 1.686289                | -2.559507 | -0.439075 |
| 5             | 6             | 0           | 2.972480                | -2.117987 | -0.055601 |
| 6             | 40            | 0           | 1.362566                | -0.155313 | 0.273969  |
| 7             | 6             | 0           | 2.546507                | 2.128506  | 0.691458  |
| 8             | 6             | 0           | 2.351443                | 2.116722  | -0.754907 |
| 9             | 6             | 0           | 3.571128                | 2.196682  | -1.638561 |
| 10            | 6             | 0           | -1.219693               | 0.202913  | 0.308975  |
| 11            | 6             | 0           | -0.680069               | 0.978326  | 1.382671  |
| 12            | 6             | 0           | -0.117372               | 0.104068  | 2.343902  |
| 13            | 6             | 0           | -0.263307               | -1.222416 | 1.861421  |
| 14            | 6             | 0           | -0.945252               | -1.156914 | 0.613663  |
| 15            | 6             | 0           | -2.093833               | 0.699777  | -0.823903 |
| 16            | 6             | 0           | -3.565761               | 0.396145  | -0.569174 |
| 17            | 6             | 0           | -4.289173               | 1.127986  | 0.382153  |
| 18            | 6             | 0           | -5.630821               | 0.838554  | 0.629402  |
| 19            | 6             | 0           | -6.267652               | -0.187465 | -0.073402 |
| 20            | 6             | 0           | -5.556728               | -0.918193 | -1.026066 |
| 21            | 6             | 0           | -4.212832               | -0.627006 | -1.271361 |
| 22            | 6             | 0           | 2.903575                | -0.234423 | 2.289678  |
| 23            | 6             | 0           | 1.088177                | 1.953687  | -1.285100 |
| 24            | 1             | 0           | -0.752291               | 2.055884  | 1.476691  |
| 25            | 1             | 0           | 2.395161                | -0.316194 | -2.812642 |
| 26            | 1             | 0           | 0.042355                | -2.125527 | 2.375129  |
| 27            | 1             | 0           | 1.110037                | -3.336107 | 0.046463  |
| 28            | 1             | 0           | -1.262166               | -2.005390 | 0.020797  |
| 29            | 1             | 0           | 3.548120                | -2.490038 | 0.780707  |
| 30            | 1             | 0           | 0.337516                | 0.394524  | 3.281309  |
| 31            | 1             | 0           | 0.386525                | -1.969766 | -2.172714 |
| 32            | 1             | 0           | -1.790010               | 0.236154  | -1.769867 |
| 33            | 1             | 0           | -1.957701               | 1.781331  | -0.943770 |
| 34            | 1             | 0           | -3.805054               | 1.934472  | 0.929201  |
| 35            | 1             | 0           | -3.670075               | -1.192300 | -2.026578 |
| 36            | 1             | 0           | -6.180701               | 1.417513  | 1.365890  |
| 37            | 1             | 0           | -6.047465               | -1.710443 | -1.584187 |
| 38            | 1             | 0           | -7.313362               | -0.410645 | 0.116583  |
| 39            | 1             | 0           | 4.349409                | -0.617055 | -0.971862 |
| 40            | 1             | 0           | 2.784706                | 0.442698  | 3.142264  |
| 41            | 1             | 0           | 2.513655                | -1.208206 | 2.595458  |
| 42            | 1             | 0           | 3.970346                | -0.340176 | 2.071301  |
| 43            | 1             | 0           | 0.949107                | 1.869771  | -2.358876 |
| 44            | 1             | 0           | 0.214353                | 2.254614  | -0.720804 |
| 45            | 1             | 0           | 3.829427                | 3.259678  | -1.739481 |
| 46            | 1             | 0           | 4.443588                | 1.700567  | -1.204355 |

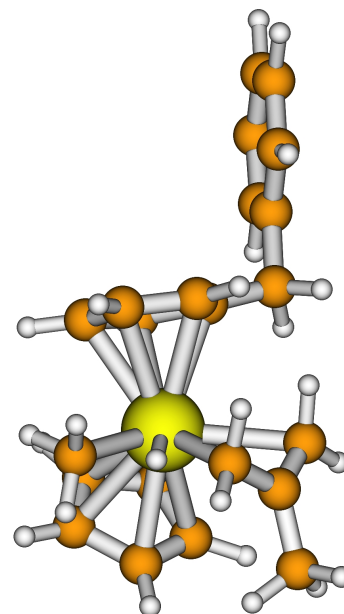

|    |   |   |          |          |           |
|----|---|---|----------|----------|-----------|
| 47 | 1 | 0 | 3.392546 | 1.810337 | -2.645036 |
| 48 | 1 | 0 | 3.540895 | 2.448545 | 1.011239  |
| 49 | 1 | 0 | 1.769642 | 2.639925 | 1.263501  |
| 50 | 1 | 0 | 2.666117 | 0.922315 | 1.365133  |

---

## Cartesian Coordinates for **8**

| Center Number | Atomic Number | Atomic Type | Coordinates (Angstroms) |           |           |
|---------------|---------------|-------------|-------------------------|-----------|-----------|
|               |               |             | X                       | Y         | Z         |
| 1             | 6             | 0           | -6.355784               | 0.387850  | 0.293540  |
| 2             | 6             | 0           | -5.737608               | 0.662863  | -0.929238 |
| 3             | 6             | 0           | -4.441607               | 0.211021  | -1.175897 |
| 4             | 6             | 0           | -3.747259               | -0.521885 | -0.203824 |
| 5             | 6             | 0           | -4.374681               | -0.795563 | 1.016849  |
| 6             | 6             | 0           | -5.672800               | -0.343682 | 1.265672  |
| 7             | 6             | 0           | -2.325382               | -1.001793 | -0.467880 |
| 8             | 6             | 0           | -1.332934               | 0.143690  | -0.461445 |
| 9             | 6             | 0           | -0.625826               | 0.664833  | -1.579207 |
| 10            | 6             | 0           | 0.112507                | 1.810904  | -1.170565 |
| 11            | 6             | 0           | -0.123394               | 2.002471  | 0.214616  |
| 12            | 6             | 0           | -0.997092               | 0.964453  | 0.656728  |
| 13            | 40            | 0           | 1.180978                | -0.125615 | 0.082508  |
| 14            | 6             | 0           | 3.896344                | 4.081742  | -0.642819 |
| 15            | 6             | 0           | 3.386908                | -0.378513 | 1.317455  |
| 16            | 6             | 0           | 2.577244                | -1.473411 | 1.725489  |
| 17            | 6             | 0           | 1.469947                | -0.953075 | 2.452885  |
| 18            | 6             | 0           | 1.606401                | 0.459398  | 2.508578  |
| 19            | 6             | 0           | 2.779239                | 0.818264  | 1.790269  |
| 20            | 1             | 0           | -0.672426               | 0.269446  | -2.587293 |
| 21            | 1             | 0           | 4.320558                | -0.440687 | 0.775669  |
| 22            | 1             | 0           | 0.261859                | 2.813026  | 0.820552  |
| 23            | 1             | 0           | 0.683751                | -1.535624 | 2.919806  |
| 24            | 1             | 0           | -1.413048               | 0.865799  | 1.652013  |
| 25            | 1             | 0           | 0.938897                | 1.142820  | 3.016666  |
| 26            | 1             | 0           | 0.723954                | 2.439167  | -1.807029 |
| 27            | 1             | 0           | 2.782294                | -2.521048 | 1.553480  |
| 28            | 1             | 0           | -2.057924               | -1.746961 | 0.292294  |
| 29            | 1             | 0           | -2.271930               | -1.511398 | -1.437648 |
| 30            | 1             | 0           | -3.971237               | 0.424157  | -2.133555 |
| 31            | 1             | 0           | -3.854141               | -1.379250 | 1.773815  |
| 32            | 1             | 0           | -6.267362               | 1.224676  | -1.693183 |
| 33            | 1             | 0           | -6.150244               | -0.570158 | 2.214719  |
| 34            | 1             | 0           | -7.366380               | 0.737072  | 0.483656  |
| 35            | 1             | 0           | 3.165411                | 1.822485  | 1.660354  |
| 36            | 1             | 0           | 3.700515                | 4.757741  | -1.478922 |
| 37            | 1             | 0           | 3.385211                | 4.454328  | 0.249932  |
| 38            | 1             | 0           | 4.972325                | 4.040360  | -0.455483 |
| 39            | 6             | 0           | 1.157185                | -2.198684 | -1.264776 |
| 40            | 1             | 0           | 1.070724                | -3.206513 | -0.865034 |
| 41            | 1             | 0           | 0.308757                | -1.885969 | -1.870591 |
| 42            | 6             | 0           | 2.439424                | -1.695983 | -1.580590 |
| 43            | 6             | 0           | 3.665234                | -2.529046 | -1.305715 |
| 44            | 1             | 0           | 3.913378                | -3.048585 | -2.241166 |
| 45            | 1             | 0           | 4.537449                | -1.927485 | -1.036010 |
| 46            | 1             | 0           | 3.496605                | -3.299882 | -0.548869 |

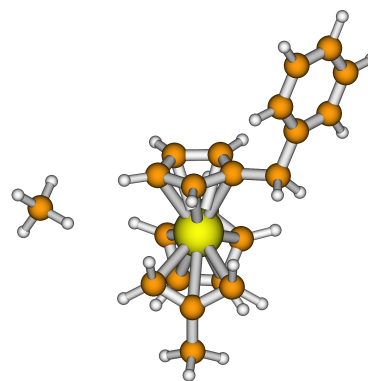



|    |   |   |          |           |           |
|----|---|---|----------|-----------|-----------|
| 47 | 6 | 0 | 2.575588 | -0.339551 | -1.954827 |
| 48 | 1 | 0 | 3.573968 | 0.072461  | -2.082383 |
| 49 | 1 | 0 | 1.828050 | 0.097398  | -2.612840 |
| 50 | 1 | 0 | 3.531957 | 3.079423  | -0.895078 |

### Bader analysis of **8**

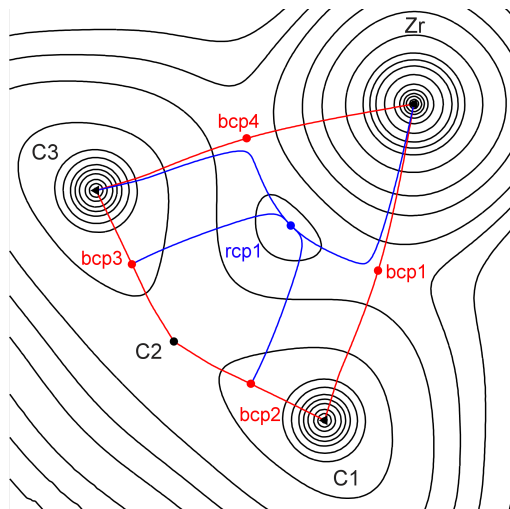

|      | $\rho(r)$ | $\nabla^2\rho(r)$ |
|------|-----------|-------------------|
| bcp1 | 0.0565    | -0.02090          |
| bcp2 | 0.3011    | 0.19716           |
| bcp3 | 0.3009    | 0.19723           |
| bcp4 | 0.0560    | -0.02062          |
| rcp1 | 0.0353    | -0.03959          |

Figure S7: Electron Density Plot of **8**, with Zr, C1 and C3 in plane and C2 below plane

### NBO Analysis of **8**

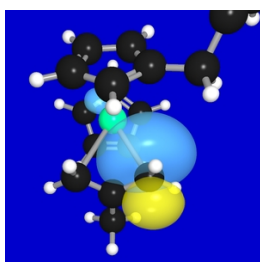

Figure S8: Zr-C1 bond, 16.41% Zr( $sd^{3.52}$ ) and 83.59% C1( $sp^{9.68}$ )

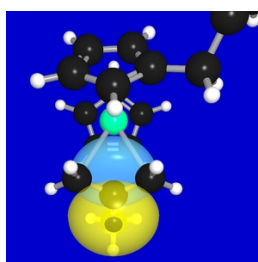

Figure S9: empty C2(p) orbital

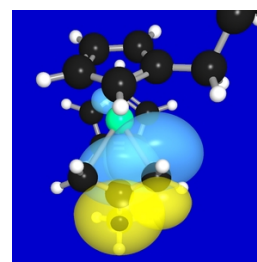

Figure S10: Zr-C1  $\rightarrow$  C2, 548.97 kJ/mol

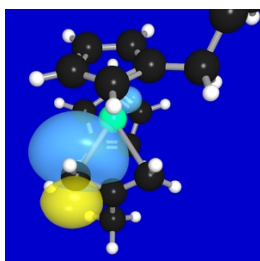

Figure S11: Zr-C3 bond, 16.67% Zr( $sd^{3.50}$ ) and 83.33% C3( $sp^{9.50}$ )

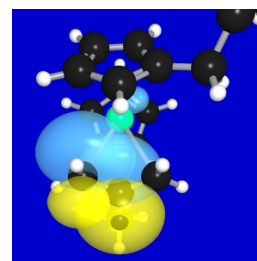

Figure S12: ZrC3  $\rightarrow$  C2, 557.47 kJ/mol

### Cartesian Coordinates for **9**

| Center Number | Atomic Number | Atomic Type | Coordinates (Angstroms) |           |           |
|---------------|---------------|-------------|-------------------------|-----------|-----------|
|               |               |             | X                       | Y         | Z         |
| 1             | 6             | 0           | -2.837499               | 3.145019  | -1.156819 |
| 2             | 6             | 0           | -4.057952               | 2.756623  | -0.587762 |
| 3             | 6             | 0           | -4.440140               | 1.409411  | -0.540221 |
| 4             | 6             | 0           | -3.616041               | 0.423516  | -1.082085 |
| 5             | 6             | 0           | -2.366003               | 0.812073  | -1.639997 |
| 6             | 6             | 0           | -2.000223               | 2.177047  | -1.704684 |
| 7             | 6             | 0           | -3.980093               | -1.050959 | -1.068173 |
| 8             | 6             | 0           | -2.844309               | -1.823173 | -0.442250 |
| 9             | 6             | 0           | -2.498572               | -1.811715 | 0.936157  |
| 10            | 6             | 0           | -1.313673               | -2.585789 | 1.111681  |
| 11            | 6             | 0           | -0.913164               | -3.065608 | -0.158613 |
| 12            | 6             | 0           | -1.835549               | -2.569625 | -1.124897 |
| 13            | 40            | 0           | -0.632033               | -0.563936 | -0.242005 |
| 14            | 6             | 0           | 1.931568                | -0.037598 | -0.178965 |
| 15            | 6             | 0           | 1.314668                | 0.893798  | -1.066778 |
| 16            | 6             | 0           | 0.804174                | 0.183009  | -2.191330 |
| 17            | 6             | 0           | 1.025074                | -1.198733 | -1.975360 |
| 18            | 6             | 0           | 1.687796                | -1.338280 | -0.715693 |
| 19            | 6             | 0           | 2.821990                | 0.291639  | 0.997819  |
| 20            | 6             | 0           | 4.270073                | 0.400098  | 0.527174  |
| 21            | 6             | 0           | 5.103415                | -0.726016 | 0.533944  |
| 22            | 6             | 0           | 6.423149                | -0.627567 | 0.092076  |
| 23            | 6             | 0           | 6.918538                | 0.596400  | -0.363489 |
| 24            | 6             | 0           | 6.093140                | 1.723657  | -0.370439 |
| 25            | 6             | 0           | 4.773506                | 1.625468  | 0.071086  |
| 26            | 6             | 0           | -0.419395               | 0.796240  | 1.883561  |
| 27            | 6             | 0           | -1.423034               | 0.753738  | 2.823902  |
| 28            | 6             | 0           | -1.398461               | -0.231297 | 3.950996  |
| 29            | 6             | 0           | -2.536056               | 1.753228  | 2.832109  |
| 30            | 1             | 0           | 1.336899                | 1.971875  | -0.956538 |
| 31            | 1             | 0           | -3.080586               | -1.350471 | 1.723144  |
| 32            | 1             | 0           | 0.796569                | -1.999719 | -2.667222 |
| 33            | 1             | 0           | -0.079969               | -3.727112 | -0.356351 |
| 34            | 1             | 0           | 2.071053                | -2.264253 | -0.304191 |
| 35            | 1             | 0           | -1.830897               | -2.802425 | -2.183673 |
| 36            | 1             | 0           | 0.360688                | 0.623063  | -3.077091 |
| 37            | 1             | 0           | -0.832077               | -2.815229 | 2.055027  |
| 38            | 1             | 0           | 2.743341                | -0.489788 | 1.763749  |
| 39            | 1             | 0           | -4.904438               | -1.212722 | -0.505321 |
| 40            | 1             | 0           | 2.511725                | 1.238863  | 1.453012  |
| 41            | 1             | 0           | -4.165075               | -1.409209 | -2.088016 |
| 42            | 1             | 0           | 4.732093                | -1.678613 | 0.906949  |
| 43            | 1             | 0           | -5.401874               | 1.136810  | -0.114790 |
| 44            | 1             | 0           | 4.143672                | 2.512931  | 0.082397  |
| 45            | 1             | 0           | -1.868893               | 0.109001  | -2.325558 |
| 46            | 1             | 0           | 7.066520                | -1.501934 | 0.114048  |

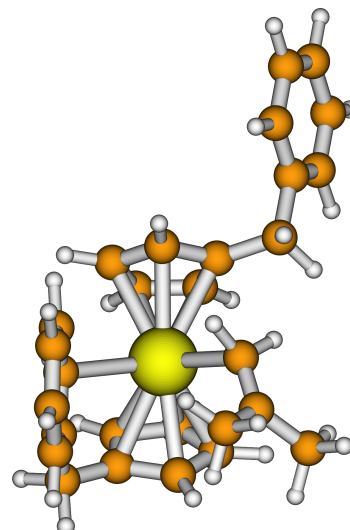

|    |   |   |           |           |           |
|----|---|---|-----------|-----------|-----------|
| 47 | 1 | 0 | -4.731336 | 3.513762  | -0.195533 |
| 48 | 1 | 0 | 6.479746  | 2.680321  | -0.708458 |
| 49 | 1 | 0 | -1.089834 | 2.474316  | -2.216235 |
| 50 | 1 | 0 | 7.947243  | 0.674101  | -0.701658 |
| 51 | 1 | 0 | -2.569922 | 4.195447  | -1.211531 |
| 52 | 1 | 0 | -3.510487 | 1.266447  | 2.958950  |
| 53 | 1 | 0 | -2.412287 | 2.403003  | 3.710807  |
| 54 | 1 | 0 | -2.550498 | 2.384177  | 1.941395  |
| 55 | 1 | 0 | -1.256945 | 0.322844  | 4.890215  |
| 56 | 1 | 0 | -2.358835 | -0.750130 | 4.059343  |
| 57 | 1 | 0 | -0.589464 | -0.961019 | 3.869293  |
| 58 | 1 | 0 | -0.299391 | 1.710156  | 1.294186  |
| 59 | 1 | 0 | 0.502981  | 0.255325  | 2.112150  |

### Bader Analysis of **9**

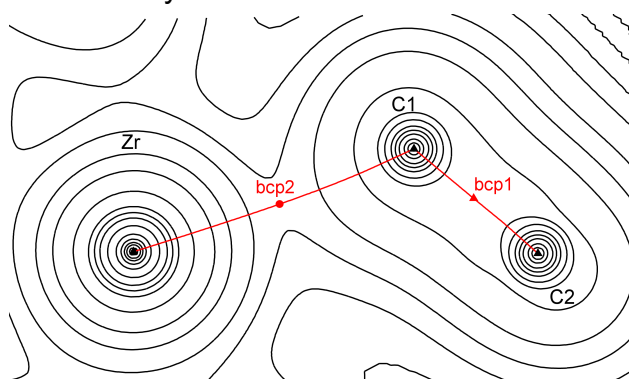

|      | $\rho(r)$ | $\nabla^2\rho(r)$ |
|------|-----------|-------------------|
| bcp1 | 0.3247    | 0.23111           |
| bcp2 | 0.0438    | -0.02317          |

Figure S13: Electron Density Plot of **10**, cut along the Zr-C1-C2 plane

## Cartesian Coordinates for **10**

| Center Number | Atomic Number | Atomic Type | Coordinates (Angstroms) |           |           |
|---------------|---------------|-------------|-------------------------|-----------|-----------|
|               |               |             | X                       | Y         | Z         |
| 1             | 6             | 0           | -2.669813               | 3.267287  | 0.189871  |
| 2             | 6             | 0           | -3.891106               | 2.727981  | 0.558718  |
| 3             | 6             | 0           | -4.313173               | 1.499549  | 0.075649  |
| 4             | 6             | 0           | -3.524395               | 0.795649  | -0.807753 |
| 5             | 6             | 0           | -2.283136               | 1.336373  | -1.177502 |
| 6             | 6             | 0           | -1.873721               | 2.583960  | -0.702874 |
| 7             | 6             | 0           | -3.899887               | -0.543546 | -1.356430 |
| 8             | 6             | 0           | -2.781384               | -1.478664 | -1.054905 |
| 9             | 6             | 0           | -2.444331               | -1.950118 | 0.223290  |
| 10            | 6             | 0           | -1.262659               | -2.715258 | 0.119067  |
| 11            | 6             | 0           | -0.856186               | -2.700938 | -1.218349 |
| 12            | 6             | 0           | -1.772772               | -1.909734 | -1.941342 |
| 13            | 40            | 0           | -0.626197               | -0.383564 | -0.407769 |
| 14            | 6             | 0           | 1.854274                | 0.119507  | -0.142306 |
| 15            | 6             | 0           | 1.230741                | 1.273979  | -0.650998 |
| 16            | 6             | 0           | 0.750111                | 0.989189  | -1.945679 |
| 17            | 6             | 0           | 1.004386                | -0.359483 | -2.215851 |
| 18            | 6             | 0           | 1.656324                | -0.906616 | -1.086940 |
| 19            | 6             | 0           | 2.709539                | 0.037294  | 1.072264  |
| 20            | 6             | 0           | 4.142935                | 0.216004  | 0.664846  |
| 21            | 6             | 0           | 4.943788                | -0.886112 | 0.429784  |
| 22            | 6             | 0           | 6.251979                | -0.719727 | 0.024214  |
| 23            | 6             | 0           | 6.763388                | 0.550294  | -0.151149 |
| 24            | 6             | 0           | 5.966816                | 1.654051  | 0.082709  |
| 25            | 6             | 0           | 4.659651                | 1.486792  | 0.488093  |
| 26            | 6             | 0           | -0.429415               | 0.157775  | 1.969290  |
| 27            | 6             | 0           | -1.407380               | -0.454124 | 2.689555  |
| 28            | 6             | 0           | -1.184882               | -1.767289 | 3.322171  |
| 29            | 6             | 0           | -2.692537               | 0.209558  | 2.970944  |
| 30            | 1             | 0           | 1.223205                | 2.241087  | -0.166689 |
| 31            | 1             | 0           | -3.038362               | -1.806175 | 1.113404  |
| 32            | 1             | 0           | 0.793117                | -0.876251 | -3.140494 |
| 33            | 1             | 0           | -0.009268               | -3.227775 | -1.631306 |
| 34            | 1             | 0           | 2.061776                | -1.905822 | -1.011397 |
| 35            | 1             | 0           | -1.759580               | -1.740213 | -3.009617 |
| 36            | 1             | 0           | 0.295548                | 1.695616  | -2.627149 |
| 37            | 1             | 0           | -0.776569               | -3.251229 | 0.922515  |
| 38            | 1             | 0           | 2.592669                | -0.933158 | 1.564033  |
| 39            | 1             | 0           | -4.829620               | -0.899095 | -0.910444 |
| 40            | 1             | 0           | 2.427198                | 0.814193  | 1.787669  |
| 41            | 1             | 0           | -4.069410               | -0.483948 | -2.434342 |
| 42            | 1             | 0           | 4.552687                | -1.885605 | 0.588396  |
| 43            | 1             | 0           | -5.279387               | 1.106488  | 0.367596  |
| 44            | 1             | 0           | 4.042423                | 2.356467  | 0.687716  |
| 45            | 1             | 0           | -1.796214               | 0.929444  | -2.077265 |
| 46            | 1             | 0           | 6.878909                | -1.585131 | -0.144341 |

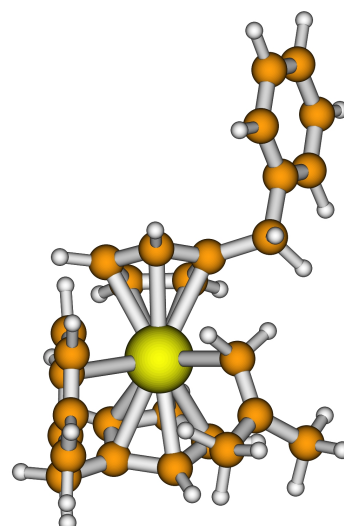

|    |   |   |           |           |           |
|----|---|---|-----------|-----------|-----------|
| 47 | 1 | 0 | -4.537993 | 3.283835  | 1.226576  |
| 48 | 1 | 0 | 6.370348  | 2.650116  | -0.041351 |
| 49 | 1 | 0 | -0.956370 | 3.030871  | -1.065191 |
| 50 | 1 | 0 | 7.791111  | 0.681379  | -0.462230 |
| 51 | 1 | 0 | -2.370393 | 4.239217  | 0.558307  |
| 52 | 1 | 0 | -3.539033 | -0.476224 | 2.892070  |
| 53 | 1 | 0 | -2.673358 | 0.534584  | 4.017924  |
| 54 | 1 | 0 | -2.861774 | 1.087110  | 2.349485  |
| 55 | 1 | 0 | -1.212678 | -1.632785 | 4.409066  |
| 56 | 1 | 0 | -1.993026 | -2.468519 | 3.096724  |
| 57 | 1 | 0 | -0.224073 | -2.210416 | 3.065007  |
| 58 | 1 | 0 | -0.519026 | 1.226930  | 1.756794  |
| 59 | 1 | 0 | 0.582083  | -0.234236 | 2.058988  |

### Bader Analysis of 10

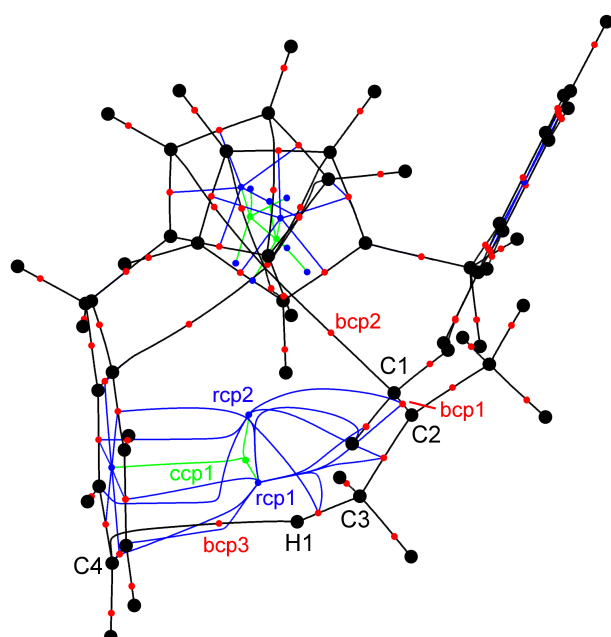

|      | $\rho(r)$ | $\nabla^2\rho(r)$ |
|------|-----------|-------------------|
| bcp1 | 0.3363    | 0.25629           |
| bcp2 | 0.0527    | -0.02662          |
| bcp3 | 0.0089    | -0.00696          |
| rcp1 | 0.0025    | -0.00209          |
| rcp2 | 0.0030    | -0.00233          |
| ccp1 | 0.0024    | -0.00230          |

Figure S14: Molecular representation of 10. Atoms are drawn in black, bond critical points in red and bonding paths in black, ring critical points and paths in blue and cage critical points and paths in green. View from the top of the molecule

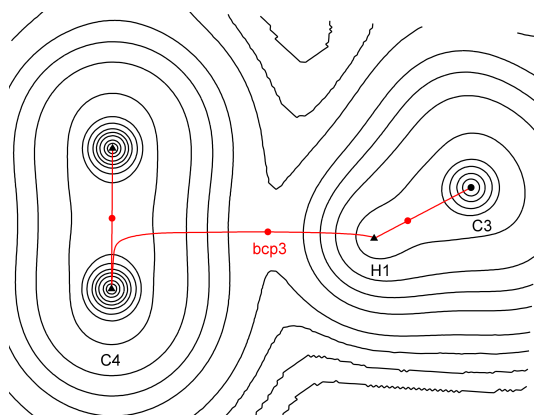

Figure S15: Electron Density Map of Me-arene interaction

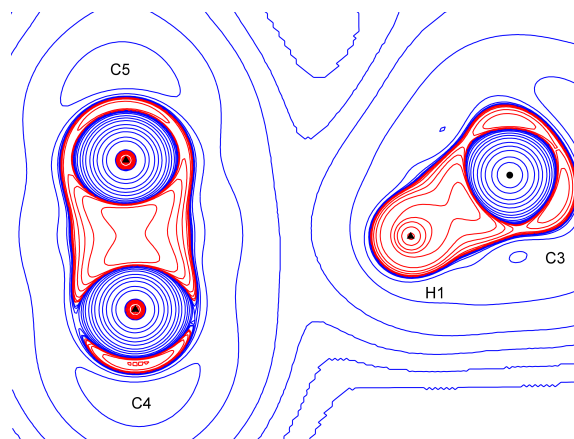

Figure S16:  $\nabla^2\rho(r)$  map: blue: negative values; red: positive values; standard values used

### Cartesian Coordinates for **11**

| Center Number | Atomic Number | Atomic Type | Coordinates (Angstroms) |           |           |
|---------------|---------------|-------------|-------------------------|-----------|-----------|
|               |               |             | X                       | Y         | Z         |
| 1             | 6             | 0           | 2.314390                | -3.089635 | 1.980090  |
| 2             | 6             | 0           | 2.238997                | -1.703144 | 2.080710  |
| 3             | 6             | 0           | 2.734023                | -0.889358 | 1.035757  |
| 4             | 6             | 0           | 3.362934                | -1.474795 | -0.100007 |
| 5             | 6             | 0           | 3.398832                | -2.871285 | -0.193527 |
| 6             | 6             | 0           | 2.894870                | -3.666885 | 0.841764  |
| 7             | 6             | 0           | 3.983224                | -0.576198 | -1.161692 |
| 8             | 6             | 0           | 2.923193                | 0.375387  | -1.659625 |
| 9             | 6             | 0           | 2.652186                | 1.683213  | -1.170194 |
| 10            | 6             | 0           | 1.470365                | 2.166139  | -1.805877 |
| 11            | 6             | 0           | 0.992765                | 1.153295  | -2.671291 |
| 12            | 6             | 0           | 1.873262                | 0.035527  | -2.564396 |
| 13            | 40            | 0           | 0.757455                | 0.207518  | -0.354428 |
| 14            | 6             | 0           | -1.787197               | -0.169829 | 0.042562  |
| 15            | 6             | 0           | -1.061496               | -1.142373 | 0.792154  |
| 16            | 6             | 0           | -0.377099               | -2.004116 | -0.115607 |
| 17            | 6             | 0           | -0.628201               | -1.541660 | -1.429770 |
| 18            | 6             | 0           | -1.461946               | -0.385984 | -1.331968 |
| 19            | 6             | 0           | -2.822005               | 0.800766  | 0.567357  |
| 20            | 6             | 0           | -4.222333               | 0.242174  | 0.332359  |
| 21            | 6             | 0           | -4.976052               | 0.666840  | -0.769441 |
| 22            | 6             | 0           | -6.252649               | 0.148551  | -0.991305 |
| 23            | 6             | 0           | -6.783249               | -0.801271 | -0.115571 |
| 24            | 6             | 0           | -6.036694               | -1.227982 | 0.985873  |
| 25            | 6             | 0           | -4.760706               | -0.710382 | 1.207973  |
| 26            | 6             | 0           | 0.311169                | 1.881039  | 1.528957  |
| 27            | 6             | 0           | 1.233909                | 2.883564  | 1.718053  |
| 28            | 6             | 0           | 1.094020                | 4.218184  | 1.054066  |
| 29            | 6             | 0           | 2.377824                | 2.732352  | 2.673269  |
| 30            | 1             | 0           | -1.101370               | -1.263566 | 1.868528  |
| 31            | 1             | 0           | 3.281097                | 2.239627  | -0.485762 |
| 32            | 1             | 0           | -0.293987               | -2.009584 | -2.346574 |
| 33            | 1             | 0           | 0.146877                | 1.234703  | -3.341369 |
| 34            | 1             | 0           | -1.893872               | 0.154350  | -2.165237 |
| 35            | 1             | 0           | 1.811628                | -0.877696 | -3.143097 |
| 36            | 1             | 0           | 0.218015                | -2.867454 | 0.153879  |
| 37            | 1             | 0           | 1.036938                | 3.151175  | -1.686225 |
| 38            | 1             | 0           | -2.733964               | 1.767428  | 0.056337  |
| 39            | 1             | 0           | 4.830790                | -0.022443 | -0.741497 |
| 40            | 1             | 0           | -2.659669               | 0.974435  | 1.637477  |
| 41            | 1             | 0           | 4.373825                | -1.177626 | -1.987566 |
| 42            | 1             | 0           | -4.579248               | 1.423825  | -1.443439 |
| 43            | 1             | 0           | 2.909203                | 0.171259  | 1.241167  |
| 44            | 1             | 0           | -4.193706               | -1.035594 | 2.078007  |
| 45            | 1             | 0           | 3.875760                | -3.341451 | -1.048978 |
| 46            | 1             | 0           | -6.835974               | 0.494863  | -1.839123 |

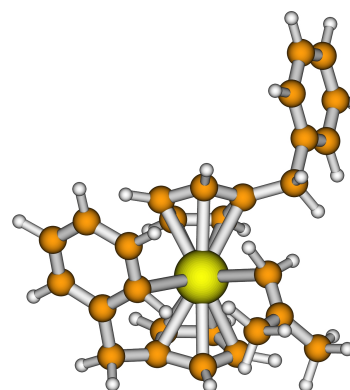

|    |   |   |           |           |           |
|----|---|---|-----------|-----------|-----------|
| 47 | 1 | 0 | 1.838784  | -1.244011 | 2.980673  |
| 48 | 1 | 0 | -6.451920 | -1.955536 | 1.676663  |
| 49 | 1 | 0 | 2.977726  | -4.747727 | 0.770039  |
| 50 | 1 | 0 | -7.778663 | -1.200203 | -0.284780 |
| 51 | 1 | 0 | 1.953726  | -3.719256 | 2.787445  |
| 52 | 1 | 0 | 3.330403  | 3.020997  | 2.211629  |
| 53 | 1 | 0 | 2.232323  | 3.433448  | 3.507479  |
| 54 | 1 | 0 | 2.459468  | 1.727720  | 3.095645  |
| 55 | 1 | 0 | 0.927836  | 4.977068  | 1.831938  |
| 56 | 1 | 0 | 2.019628  | 4.516910  | 0.546265  |
| 57 | 1 | 0 | 0.254723  | 4.266359  | 0.356654  |
| 58 | 1 | 0 | 0.271403  | 1.067042  | 2.257689  |
| 59 | 1 | 0 | -0.643988 | 2.147424  | 1.069191  |

### Bader Analysis of **11**

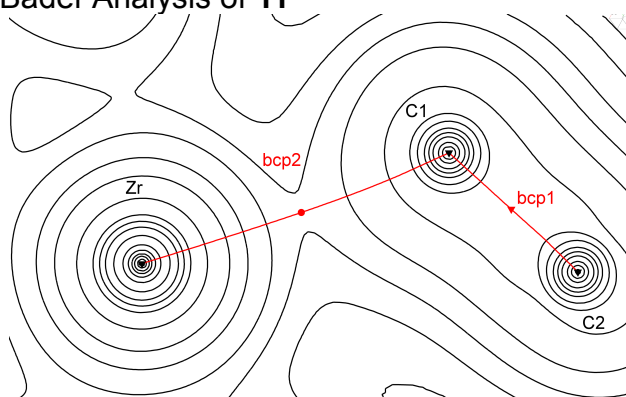

|      | $\rho(r)$ | $\nabla^2\rho(r)$ |
|------|-----------|-------------------|
| bcp1 | 0.3248    | 0.23097           |
| bcp2 | 0.0417    | -0.0223           |

Figure S17: Electron Density Map of **11**, Zr, C1 and C2 in plane

## Cartesian Coordinates for **12**

| Center Number | Atomic Number | Atomic Type | Coordinates (Angstroms) |           |           |
|---------------|---------------|-------------|-------------------------|-----------|-----------|
|               |               |             | X                       | Y         | Z         |
| 1             | 6             | 0           | -6.920681               | 0.390280  | -0.055919 |
| 2             | 6             | 0           | -6.462269               | -0.604188 | 0.813094  |
| 3             | 6             | 0           | -5.239635               | -1.233104 | 0.576593  |
| 4             | 6             | 0           | -4.459249               | -0.872315 | -0.533173 |
| 5             | 6             | 0           | -4.927565               | 0.122050  | -1.401903 |
| 6             | 6             | 0           | -6.154315               | 0.750121  | -1.166354 |
| 7             | 6             | 0           | -3.145854               | -1.582079 | -0.807054 |
| 8             | 6             | 0           | -2.126063               | -1.457540 | 0.310668  |
| 9             | 6             | 0           | -2.037277               | -0.405143 | 1.274819  |
| 10            | 6             | 0           | -0.948875               | -0.682388 | 2.153180  |
| 11            | 6             | 0           | -0.333843               | -1.888030 | 1.724833  |
| 12            | 6             | 0           | -1.055570               | -2.360093 | 0.583054  |
| 13            | 40            | 0           | 0.055171                | -0.253753 | -0.096789 |
| 14            | 6             | 0           | 2.548341                | 0.063896  | -0.467647 |
| 15            | 6             | 0           | 1.898894                | 0.277051  | -1.719091 |
| 16            | 6             | 0           | 1.307133                | -0.953484 | -2.145700 |
| 17            | 6             | 0           | 1.563840                | -1.929200 | -1.151059 |
| 18            | 6             | 0           | 2.287876                | -1.296928 | -0.094399 |
| 19            | 6             | 0           | 3.414818                | 1.046819  | 0.290517  |
| 20            | 6             | 0           | 4.871896                | 0.601688  | 0.216279  |
| 21            | 6             | 0           | 5.505366                | 0.057662  | 1.341139  |
| 22            | 6             | 0           | 6.837742                | -0.350694 | 1.267371  |
| 23            | 6             | 0           | 7.541776                | -0.226731 | 0.066743  |
| 24            | 6             | 0           | 6.913216                | 0.312409  | -1.059619 |
| 25            | 6             | 0           | 5.582154                | 0.720555  | -0.987989 |
| 26            | 6             | 0           | -0.205369               | 2.247647  | -0.208292 |
| 27            | 6             | 0           | -1.392884               | 2.723407  | 0.311834  |
| 28            | 6             | 0           | -1.526538               | 3.098872  | 1.754105  |
| 29            | 6             | 0           | -2.577217               | 2.973359  | -0.565702 |
| 30            | 1             | 0           | 1.926418                | 1.196518  | -2.292464 |
| 31            | 1             | 0           | -2.750671               | 0.400796  | 1.374732  |
| 32            | 1             | 0           | 1.297201                | -2.976918 | -1.202824 |
| 33            | 1             | 0           | 0.481532                | -2.400777 | 2.219623  |
| 34            | 1             | 0           | 2.701982                | -1.794789 | 0.774224  |
| 35            | 1             | 0           | -0.879225               | -3.295908 | 0.066901  |
| 36            | 1             | 0           | 0.792570                | -1.121677 | -3.086958 |
| 37            | 1             | 0           | -0.660737               | -0.094990 | 3.018915  |
| 38            | 1             | 0           | 3.112873                | 1.101852  | 1.344688  |
| 39            | 1             | 0           | -3.308158               | -2.654050 | -0.984789 |
| 40            | 1             | 0           | 3.290668                | 2.048457  | -0.137859 |
| 41            | 1             | 0           | -2.725369               | -1.204258 | -1.755481 |
| 42            | 1             | 0           | 4.970009                | -0.020569 | 2.285364  |
| 43            | 1             | 0           | -4.905976               | -2.023403 | 1.245904  |
| 44            | 1             | 0           | 5.105566                | 1.152795  | -1.865373 |
| 45            | 1             | 0           | -4.354036               | 0.381840  | -2.290306 |
| 46            | 1             | 0           | 7.328388                | -0.753823 | 2.148026  |

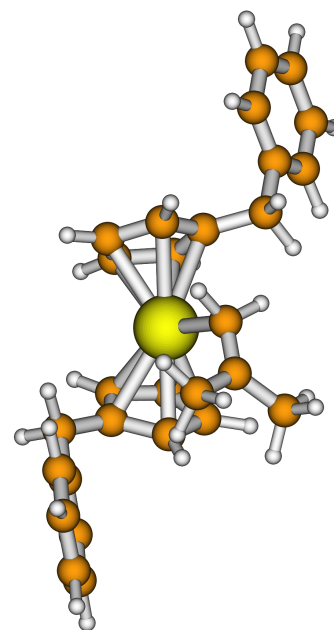



|    |   |   |           |           |           |
|----|---|---|-----------|-----------|-----------|
| 47 | 1 | 0 | -7.064289 | -0.901395 | 1.666470  |
| 48 | 1 | 0 | 7.461997  | 0.421608  | -1.990005 |
| 49 | 1 | 0 | -6.517519 | 1.503765  | -1.858839 |
| 50 | 1 | 0 | 8.579103  | -0.541948 | 0.010650  |
| 51 | 1 | 0 | -7.877983 | 0.869985  | 0.123305  |
| 52 | 1 | 0 | -3.451213 | 2.396132  | -0.235845 |
| 53 | 1 | 0 | -2.867036 | 4.029797  | -0.477725 |
| 54 | 1 | 0 | -2.381947 | 2.756847  | -1.618780 |
| 55 | 1 | 0 | -1.540798 | 4.197750  | 1.812360  |
| 56 | 1 | 0 | -2.480490 | 2.768149  | 2.180073  |
| 57 | 1 | 0 | -0.696544 | 2.748664  | 2.373169  |
| 58 | 1 | 0 | -0.058260 | 2.322354  | -1.288280 |
| 59 | 1 | 0 | 0.706033  | 2.373941  | 0.390722  |

### Bader Analysis of **12**

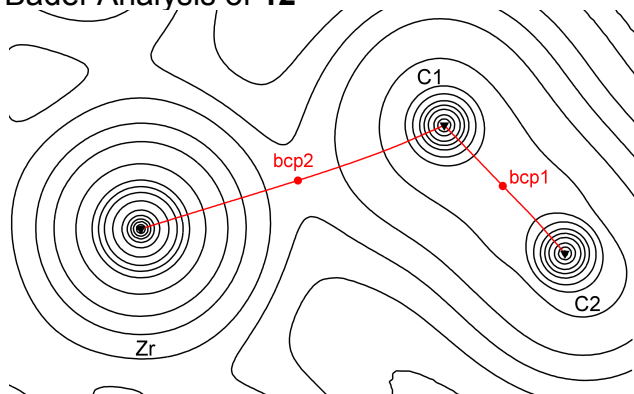

|      | $\rho(r)$ | $\nabla^2\rho(r)$ |
|------|-----------|-------------------|
| bcp1 | 0.3220    | 0.22757           |
| bcp2 | 0.0464    | -0.02409          |

Figure S18: Electron Density Map of **12**, Zr, C1 and C2 in plane
